# Supplementary material for: Evaluation of the Chemical Composition of Gas and Particle Phase Products of Aromatic Oxidation
Source: Copernicus journal article supplement (doi:10.5194/acp-2020-161), 2020-03-25
Supplement: Supplementary file 1 [file acp-2020-161-supplement.pdf]

# Supplementary Data

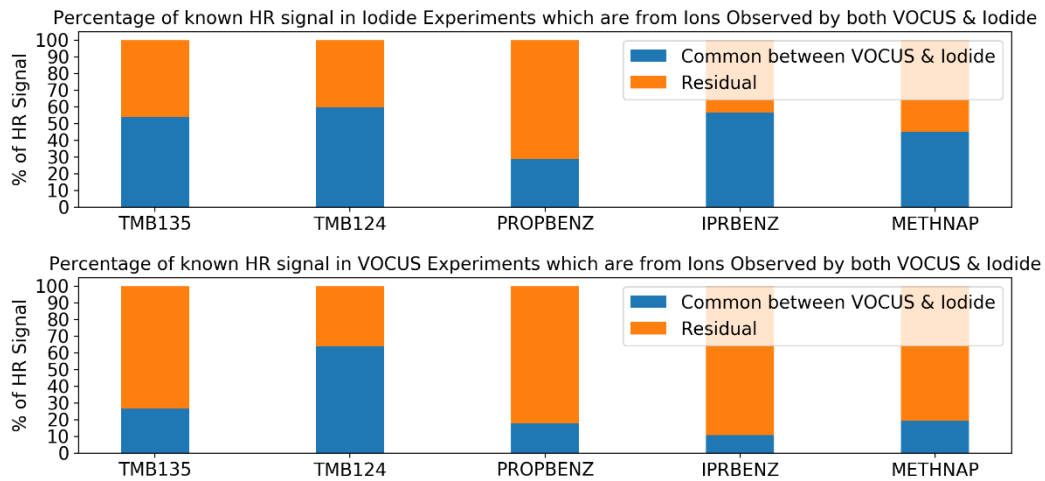

Figure S1 - Signal Contribution of Ions observed by both Vocus & I-CIMS during OH experiments (I-CIMS particle phase) and Vocus (gas phase)

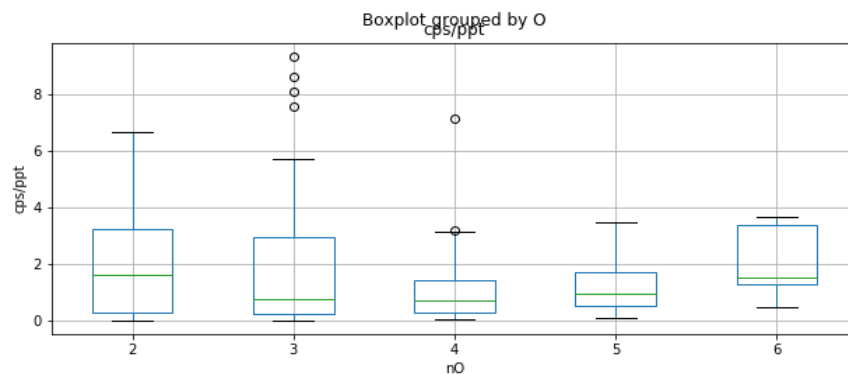

Figure S2 – Derivation of relative sensitivities from measured ion signals common between both iodide and Vocus in the gas phase under low-NOx conditions.

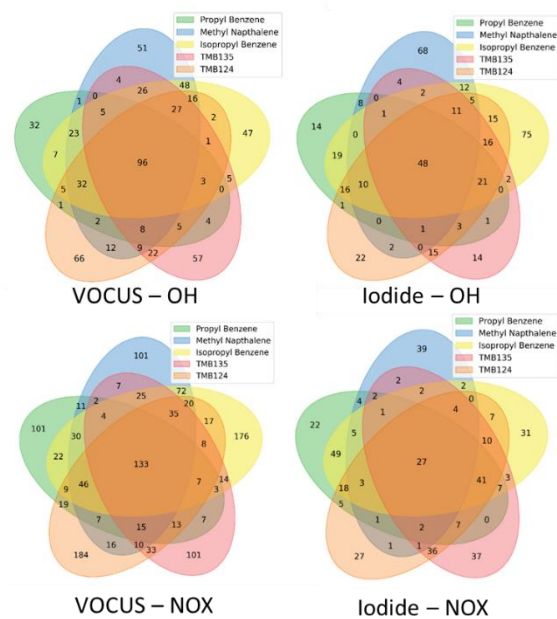

Figure S3- Venn Diagrams showing number of ions overlap in ions observed from all precursors under different conditions

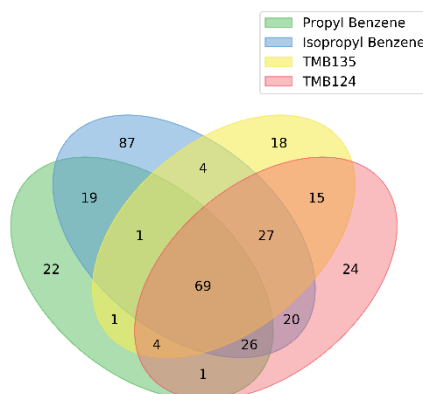

Figure S4- Venn showing overlap in number of ion formulas for C<sub>9</sub>-aromatics

Table S1. Comparison with Ions observed from LC-MS by (Sato et al., 2012)

| Ion                                           | I-CIMS | VOCUS |
|-----------------------------------------------|--------|-------|
| C <sub>3</sub> H <sub>4</sub> O <sub>3</sub>  | ✓      | ✓     |
| C <sub>6</sub> H <sub>8</sub> O <sub>3</sub>  | ✓      | ✗     |
| C <sub>6</sub> H <sub>10</sub> O <sub>5</sub> | ✓      | ✗     |
| C <sub>8</sub> H <sub>10</sub> O <sub>4</sub> | ✓      | ✗     |
| C <sub>7</sub> H <sub>10</sub> O <sub>5</sub> | ✓      | ✗     |

|         |   |   |
|---------|---|---|
| C9H12O4 | ✓ | x |
| C8H10O5 | ✓ | x |
| C7H10O7 | ✓ | x |
| C7H12O6 | ✓ | x |
| C9H12O5 | ✓ | x |
| C9H14O5 | ✓ | x |
| C8H12O6 | ✓ | x |
| C9H12O6 | ✓ | x |
| C9H14O6 | ✓ | x |
| C9H12O7 | ✓ | x |
| C9H14O7 | ✓ | x |

Top 20 Ions by Signal for Each Precursor and Set of Conditions

| sumFormula | ion       | x0       | commonions | uniqueions | mcmions |
|------------|-----------|----------|------------|------------|---------|
| C3H4O5     | C3H4O5I-  | 246.9109 | TRUE       | FALSE      | TRUE    |
| C4H4O6     | C4H4O6I-  | 274.9058 | TRUE       | FALSE      | TRUE    |
| C4H6O6     | C4H6O6I-  | 276.9215 | TRUE       | FALSE      | FALSE   |
| C3H4O4     | C3H4O4I-  | 230.916  | TRUE       | FALSE      | TRUE    |
| C4H4O5     | C4H4O5I-  | 258.9109 | TRUE       | FALSE      | TRUE    |
| C5H6O6     | C5H6O6I-  | 288.9215 | TRUE       | FALSE      | FALSE   |
| C4H6O5     | C4H6O5I-  | 260.9265 | TRUE       | FALSE      | TRUE    |
| C5H12O4    | C5H12O4I- | 262.9786 | FALSE      | FALSE      | FALSE   |
| C5H10O4    | C5H10O4I- | 260.9629 | FALSE      | FALSE      | TRUE    |
| C4H4O4     | C4H4O4I-  | 242.916  | TRUE       | FALSE      | TRUE    |
| C6H8O6     | C6H8O6I-  | 302.9371 | FALSE      | FALSE      | FALSE   |
| C5H6O5     | C5H6O5I-  | 272.9265 | TRUE       | FALSE      | FALSE   |
| C2H4O3     | C2H4O3I-  | 202.9211 | TRUE       | FALSE      | TRUE    |
| C6H6O6     | C6H6O6I-  | 300.9215 | TRUE       | FALSE      | FALSE   |
| C8H12O6    | C8H12O6I- | 330.9684 | TRUE       | FALSE      | TRUE    |
| C5H8O4     | C5H8O4I-  | 258.9473 | FALSE      | FALSE      | FALSE   |
| C9H12O6    | C9H12O6I- | 342.9684 | TRUE       | FALSE      | TRUE    |
| C8H10O6    | C8H10O6I- | 328.9528 | TRUE       | FALSE      | FALSE   |
| C7H10O6    | C7H10O6I- | 316.9528 | FALSE      | FALSE      | TRUE    |
| C5H8O5     | C5H8O5I-  | 274.9422 | FALSE      | FALSE      | FALSE   |

Table S2 - Top 20 IPRBENZ LOW-NOX I-CIMS

| sumFormula | ion      | x0       | commonions | uniqueions | mcmions |
|------------|----------|----------|------------|------------|---------|
| C2H2O4     | C2H2O4I- | 216.9003 | FALSE      | FALSE      | TRUE    |
| C3H4O5     | C3H4O5I- | 246.9109 | TRUE       | FALSE      | TRUE    |
| C4H4O6     | C4H4O6I- | 274.9058 | TRUE       | FALSE      | TRUE    |
| C4H4O5     | C4H4O5I- | 258.9109 | TRUE       | FALSE      | TRUE    |
| C3H4O4     | C3H4O4I- | 230.916  | TRUE       | FALSE      | TRUE    |
| C4H4O4     | C4H4O4I- | 242.916  | TRUE       | FALSE      | TRUE    |
| C4H2O4     | C4H2O4I- | 240.9003 | TRUE       | FALSE      | TRUE    |
| C5H6O6     | C5H6O6I- | 288.9215 | TRUE       | FALSE      | FALSE   |
| C5H6O5     | C5H6O5I- | 272.9265 | TRUE       | FALSE      | FALSE   |
| C8H4O3     | C8H4O3I- | 274.9211 | FALSE      | TRUE       | FALSE   |
| C2H4O3     | C2H4O3I- | 202.9211 | TRUE       | FALSE      | TRUE    |
| C4H6O5     | C4H6O5I- | 260.9265 | TRUE       | FALSE      | TRUE    |
| C2H2O3     | C2H2O3I- | 200.9054 | FALSE      | FALSE      | TRUE    |
| C5H4O5     | C5H4O5I- | 270.9109 | FALSE      | FALSE      | FALSE   |
| C4H6O6     | C4H6O6I- | 276.9215 | TRUE       | FALSE      | FALSE   |
| C4H2O5     | C4H2O5I- | 256.8952 | FALSE      | FALSE      | TRUE    |
| C4H6O4     | C4H6O4I- | 244.9316 | TRUE       | FALSE      | TRUE    |
| C8H4O2     | C8H4O2I- | 258.9262 | FALSE      | TRUE       | FALSE   |
| C6H6O6     | C6H6O6I- | 300.9215 | TRUE       | FALSE      | FALSE   |
| C6H4O6     | C6H4O6I- | 298.9058 | TRUE       | FALSE      | FALSE   |

Table S3 Top 20 PROP BENZ Low-NOX I-CIMS

| sumFormula | ion       | x0       | commonions | uniqueions | mcmions |
|------------|-----------|----------|------------|------------|---------|
| C4H4O6     | C4H4O6I-  | 274.9058 | TRUE       | FALSE      | TRUE    |
| C5H6O5     | C5H6O5I-  | 272.9265 | TRUE       | FALSE      | TRUE    |
| C7H10O6    | C7H10O6I- | 316.9528 | FALSE      | FALSE      | FALSE   |
| C9H14O6    | C9H14O6I- | 344.9841 | TRUE       | FALSE      | TRUE    |
| C9H12O6    | C9H12O6I- | 342.9684 | TRUE       | FALSE      | TRUE    |
| C6H8O5     | C6H8O5I-  | 286.9422 | FALSE      | FALSE      | TRUE    |
| C7H10O5    | C7H10O5I- | 300.9578 | FALSE      | FALSE      | FALSE   |
| C7H8O6     | C7H8O6I-  | 314.9371 | TRUE       | FALSE      | FALSE   |
| C9H12O7    | C9H12O7I- | 358.9633 | TRUE       | FALSE      | FALSE   |
| C8H10O6    | C8H10O6I- | 328.9528 | TRUE       | FALSE      | FALSE   |
| C3H4O5     | C3H4O5I-  | 246.9109 | TRUE       | FALSE      | TRUE    |
| C6H8O6     | C6H8O6I-  | 302.9371 | FALSE      | FALSE      | FALSE   |
| C4H4O4     | C4H4O4I-  | 242.916  | TRUE       | FALSE      | TRUE    |
| C5H8O5     | C5H8O5I-  | 274.9422 | FALSE      | FALSE      | TRUE    |
| C4H2O4     | C4H2O4I-  | 240.9003 | TRUE       | FALSE      | FALSE   |
| C5H6O6     | C5H6O6I-  | 288.9215 | TRUE       | FALSE      | TRUE    |
| C3H4O4     | C3H4O4I-  | 230.916  | TRUE       | FALSE      | TRUE    |
| C2H2O3     | C2H2O3I-  | 200.9054 | FALSE      | FALSE      | TRUE    |
| C8H12O6    | C8H12O6I- | 330.9684 | TRUE       | FALSE      | FALSE   |
| C4H4O5     | C4H4O5I-  | 258.9109 | TRUE       | FALSE      | TRUE    |

Table S4 Top 20 TMB124 Low NOx I-CIMS

| sumFormula | ion       | x0       | commonions | uniqueions | mcmions |
|------------|-----------|----------|------------|------------|---------|
| C2H2O4     | C2H2O4I-  | 216.9003 | FALSE      | FALSE      | TRUE    |
| C7H10O6    | C7H10IO6- | 316.9528 | FALSE      | FALSE      | FALSE   |
| C5H6O5     | C5H6O5I-  | 272.9265 | TRUE       | FALSE      | TRUE    |
| C9H12O6    | C9H12IO6- | 342.9684 | TRUE       | FALSE      | FALSE   |
| C9H14O6    | C9H14IO6- | 344.9841 | TRUE       | FALSE      | TRUE    |
| C8H10O6    | C8H10IO6- | 328.9528 | TRUE       | FALSE      | FALSE   |
| C7H10O5    | C7H10IO5- | 300.9578 | FALSE      | FALSE      | FALSE   |
| C8H10O7    | C8H10IO7- | 344.9477 | TRUE       | FALSE      | FALSE   |
| C7H8O6     | C7H8IO6-  | 314.9371 | TRUE       | FALSE      | FALSE   |
| C9H12O7    | C9H12IO7- | 358.9633 | TRUE       | FALSE      | FALSE   |
| C4H4O6     | C4H4IO6-  | 274.9058 | TRUE       | FALSE      | FALSE   |
| C6H8O6     | C6H8O6I-  | 302.9371 | FALSE      | FALSE      | TRUE    |
| C9H14O5    | C9H14IO5- | 328.9891 | TRUE       | FALSE      | TRUE    |
| C8H12O6    | C8H12IO6- | 330.9684 | TRUE       | FALSE      | FALSE   |
| C3H4O4     | C3H4IO4-  | 230.916  | TRUE       | FALSE      | FALSE   |
| C6H8O5     | C6H8O5I-  | 286.9422 | FALSE      | FALSE      | TRUE    |
| C5H6O6     | C5H6O6I-  | 288.9215 | TRUE       | FALSE      | TRUE    |
| C5H8O5     | C5H8O5I-  | 274.9422 | FALSE      | FALSE      | TRUE    |
| C5H6O4     | C5H6O4I-  | 256.9316 | TRUE       | FALSE      | TRUE    |
| C6H6O6     | C6H6IO6-  | 300.9215 | TRUE       | FALSE      | FALSE   |

Table S5 TMB135 Low-NO<sub>x</sub> I-CIMS

| sumFormula | ion       | x0       | commonions | uniqueions |
|------------|-----------|----------|------------|------------|
| C3H4O5     | C3H4IO5-  | 246.9109 | TRUE       | FALSE      |
| C4H4O6     | C4H4IO6-  | 274.9058 | TRUE       | FALSE      |
| C4H4O5     | C4H4IO5-  | 258.9109 | TRUE       | FALSE      |
| C2H4O3     | C2H4IO3-  | 202.9211 | TRUE       | FALSE      |
| C4H4O4     | C4H4IO4-  | 242.916  | TRUE       | FALSE      |
| C3H4O4     | C3H4IO4-  | 230.916  | TRUE       | FALSE      |
| C4H2O4     | C4H2IO4-  | 240.9003 | TRUE       | FALSE      |
| C5H4O5     | C5H4IO5-  | 270.9109 | FALSE      | FALSE      |
| C4H2O5     | C4H2IO5-  | 256.8952 | FALSE      | FALSE      |
| C5H6O5     | C5H6IO5-  | 272.9265 | TRUE       | FALSE      |
| C9H6O4     | C9H6IO4-  | 304.9316 | FALSE      | FALSE      |
| C6H6O5     | C6H6IO5-  | 284.9265 | TRUE       | FALSE      |
| C6H4O6     | C6H4IO6-  | 298.9058 | TRUE       | FALSE      |
| C5H6O6     | C5H6IO6-  | 288.9215 | TRUE       | FALSE      |
| C5H4O4     | C5H4IO4-  | 254.916  | TRUE       | FALSE      |
| C6H6O6     | C6H6IO6-  | 300.9215 | TRUE       | FALSE      |
| C5H6O4     | C5H6IO4-  | 256.9316 | TRUE       | FALSE      |
| C7H6O5     | C7H6IO5-  | 296.9265 | TRUE       | FALSE      |
| C10H8O4    | C10H8IO4- | 318.9473 | FALSE      | FALSE      |
| C3H2O4     | C3H2IO4-  | 228.9003 | TRUE       | FALSE      |

Table S6 METHNAP Low-NO<sub>x</sub> I-CIMS

| sumFormula | ion       | x0       | commonions | uniqueions | mcmions |
|------------|-----------|----------|------------|------------|---------|
| C3H6O3     | C3H6O3I-  | 216.9367 | FALSE      | FALSE      | TRUE    |
| C4H4O4     | C4H4O4I-  | 242.916  | TRUE       | FALSE      | TRUE    |
| C5H6O6     | C5H6IO6-  | 288.9215 | FALSE      | FALSE      | FALSE   |
| C4H4O5     | C4H4O5I-  | 258.9109 | TRUE       | FALSE      | TRUE    |
| C3H4O5     | C3H4O5I-  | 246.9109 | TRUE       | FALSE      | TRUE    |
| C4H4O6     | C4H4O6I-  | 274.9058 | FALSE      | FALSE      | TRUE    |
| C6H6O6     | C6H6IO6-  | 300.9215 | FALSE      | FALSE      | FALSE   |
| C5H6O5     | C5H6IO5-  | 272.9265 | TRUE       | FALSE      | FALSE   |
| C4H6O6     | C4H6IO6-  | 276.9215 | FALSE      | FALSE      | FALSE   |
| C5H4O5     | C5H4IO5-  | 270.9109 | FALSE      | FALSE      | FALSE   |
| C3H4O4     | C3H4O4I-  | 230.916  | TRUE       | FALSE      | TRUE    |
| C4H6O5     | C4H6IO5-  | 260.9265 | TRUE       | FALSE      | TRUE    |
| C6H8O6     | C6H8IO6-  | 302.9371 | FALSE      | FALSE      | FALSE   |
| C4H2O5     | C4H2O5I-  | 256.8952 | TRUE       | FALSE      | TRUE    |
| C6H6O7     | C6H6IO7-  | 316.9164 | FALSE      | FALSE      | FALSE   |
| C8H10O6    | C8H10IO6- | 328.9528 | TRUE       | FALSE      | FALSE   |
| C5H4O6     | C5H4IO6-  | 286.9058 | TRUE       | FALSE      | FALSE   |
| C6H6O5     | C6H6IO5-  | 284.9265 | TRUE       | FALSE      | FALSE   |
| C8H10O7    | C8H10IO7- | 344.9477 | TRUE       | FALSE      | FALSE   |
| C9H12O7    | C9H12IO7- | 358.9633 | FALSE      | FALSE      | FALSE   |

Table S7 IPRBENZ Medium-NOx I-CIMS

| sumFormula | ion       | x0       | commonions | uniqueions |
|------------|-----------|----------|------------|------------|
| C4H2O4     | C4H2IO4-  | 240.9003 | TRUE       | FALSE      |
| C4H4O5     | C4H4IO5-  | 258.9109 | TRUE       | FALSE      |
| C7H2NO3    | C7H2INO3- | 274.9085 | FALSE      | TRUE       |
| C4H4O4     | C4H4IO4-  | 242.916  | TRUE       | FALSE      |
| C2H4O3     | C2H4IO3-  | 202.9211 | TRUE       | FALSE      |
| C3H4O4     | C3H4IO4-  | 230.916  | TRUE       | FALSE      |
| C3H4O5     | C3H4IO5-  | 246.9109 | TRUE       | FALSE      |
| C8H2NO2    | C8H2INO2- | 270.9136 | FALSE      | TRUE       |
| C3H2O5     | C3H2IO5-  | 244.8952 | FALSE      | FALSE      |
| C3H2O4     | C3H2IO4-  | 228.9003 | TRUE       | FALSE      |
| C5H6O5     | C5H6IO5-  | 272.9265 | TRUE       | FALSE      |
| C9H6O4     | C9H6IO4-  | 304.9316 | FALSE      | TRUE       |
| C4H2O5     | C4H2IO5-  | 256.8952 | TRUE       | FALSE      |
| C8H4NO3    | C8H4INO3- | 288.9241 | FALSE      | TRUE       |
| C9H4NO3    | C9H4INO3- | 300.9241 | FALSE      | TRUE       |
| C6H6O5     | C6H6IO5-  | 284.9265 | TRUE       | FALSE      |
| C5H4O4     | C5H4IO4-  | 254.916  | TRUE       | FALSE      |
| C6H4O5     | C6H4IO5-  | 282.9109 | TRUE       | FALSE      |
| C6H4O6     | C6H4IO6-  | 298.9058 | TRUE       | FALSE      |
| C5H4O6     | C5H4IO6-  | 286.9058 | TRUE       | FALSE      |

Table S8 METHNAP Medium-NOx I-CIMS

| sumFormula | ion      | x0       | commonions | uniqueions | mcmions |
|------------|----------|----------|------------|------------|---------|
| C2H2O4     | C2H2O4I- | 216.9003 | FALSE      | FALSE      | TRUE    |
| C3H4O5     | C3H4O5I- | 246.9109 | TRUE       | FALSE      | TRUE    |
| C4H4O6     | C4H4O6I- | 274.9058 | FALSE      | FALSE      | TRUE    |
| C4H4O5     | C4H4O5I- | 258.9109 | TRUE       | FALSE      | TRUE    |
| C4H4O4     | C4H4O4I- | 242.916  | TRUE       | FALSE      | TRUE    |
| C3H4O4     | C3H4O4I- | 230.916  | TRUE       | FALSE      | TRUE    |
| C4H2O4     | C4H2O4I- | 240.9003 | TRUE       | FALSE      | TRUE    |
| C5H6O6     | C5H6O6I- | 288.9215 | FALSE      | FALSE      | FALSE   |
| C5H6O5     | C5H6O5I- | 272.9265 | TRUE       | FALSE      | FALSE   |
| C2H4O3     | C2H4O3I- | 202.9211 | TRUE       | FALSE      | TRUE    |
| C2H2O3     | C2H2O3I- | 200.9054 | FALSE      | FALSE      | TRUE    |
| C5H4O5     | C5H4O5I- | 270.9109 | FALSE      | FALSE      | FALSE   |
| C4H6O5     | C4H6O5I- | 260.9265 | TRUE       | FALSE      | TRUE    |
| C6H6O6     | C6H6O6I- | 300.9215 | FALSE      | FALSE      | FALSE   |
| C4H2O5     | C4H2O5I- | 256.8952 | TRUE       | FALSE      | TRUE    |
| C4H6O6     | C4H6O6I- | 276.9215 | FALSE      | FALSE      | FALSE   |
| C4H6O4     | C4H6O4I- | 244.9316 | TRUE       | FALSE      | TRUE    |
| C6H4O6     | C6H4O6I- | 298.9058 | TRUE       | FALSE      | FALSE   |
| C6H8O6     | C6H8O6I- | 302.9371 | FALSE      | FALSE      | FALSE   |
| C3H2O4     | C3H2O4I- | 228.9003 | TRUE       | FALSE      | FALSE   |

Table S9 PROP BENZ Medium-NO<sub>x</sub> I-CIMS

| sumFormula | ion        | x0       | commonions | uniqueions | mcmions |
|------------|------------|----------|------------|------------|---------|
| C2H2O4     | C2H2O4I-   | 216.9003 | FALSE      | FALSE      | TRUE    |
| C9H12O6    | C9H12O6I-  | 342.9684 | FALSE      | FALSE      | TRUE    |
| C7H10O6    | C7H10O6I-  | 316.9528 | TRUE       | FALSE      | FALSE   |
| C8H10O6    | C8H10O6I-  | 328.9528 | TRUE       | FALSE      | FALSE   |
| C8H10O7    | C8H10O7I-  | 344.9477 | TRUE       | FALSE      | FALSE   |
| C9H14O6    | C9H14O6I-  | 344.9841 | FALSE      | FALSE      | TRUE    |
| C7H8O6     | C7H8O6I-   | 314.9371 | FALSE      | FALSE      | FALSE   |
| C5H6O5     | C5H6O5I-   | 272.9265 | TRUE       | FALSE      | TRUE    |
| C7H10O5    | C7H10O5I-  | 300.9578 | FALSE      | FALSE      | FALSE   |
| C8H12O6    | C8H12O6I-  | 330.9684 | FALSE      | FALSE      | FALSE   |
| C6H8O6     | C6H8O6I-   | 302.9371 | FALSE      | FALSE      | FALSE   |
| C2H2O3     | C2H2O3I-   | 200.9054 | FALSE      | FALSE      | TRUE    |
| C10H6NO4   | C10H6INO4- | 330.9347 | FALSE      | FALSE      | FALSE   |
| C4H4O6     | C4H4O6I-   | 274.9058 | FALSE      | FALSE      | TRUE    |
| C6H8O5     | C6H8O5I-   | 286.9422 | TRUE       | FALSE      | TRUE    |
| C4H4O4     | C4H4O4I-   | 242.916  | TRUE       | FALSE      | TRUE    |
| C7H8O5     | C7H8O5I-   | 298.9422 | FALSE      | FALSE      | TRUE    |
| C3H4O4     | C3H4O4I-   | 230.916  | TRUE       | FALSE      | TRUE    |
| C6H6O6     | C6H6O6I-   | 300.9215 | FALSE      | FALSE      | FALSE   |
| C8H10NO7   | C8H10NO7I- | 358.9507 | FALSE      | FALSE      | TRUE    |

Table S10 TMB124 Medium-NO<sub>x</sub> I-CIMS

| sumFormula | ion        | x0       | commonions | uniqueions | mcmions |
|------------|------------|----------|------------|------------|---------|
| C7H10O6    | C7H10IO6-  | 316.9528 | TRUE       | FALSE      | FALSE   |
| C9H12O6    | C9H12IO6-  | 342.9684 | FALSE      | FALSE      | FALSE   |
| C8H10O7    | C8H10IO7-  | 344.9477 | TRUE       | FALSE      | FALSE   |
| C8H10O6    | C8H10IO6-  | 328.9528 | TRUE       | FALSE      | FALSE   |
| C2H2O4     | C2H2O4I-   | 216.9003 | FALSE      | FALSE      | TRUE    |
| C7H10O5    | C7H10IO5-  | 300.9578 | FALSE      | FALSE      | FALSE   |
| C9H12O7    | C9H12IO7-  | 358.9633 | FALSE      | FALSE      | FALSE   |
| C5H6O5     | C5H6O5I-   | 272.9265 | TRUE       | FALSE      | TRUE    |
| C9H14O6    | C9H14O6I-  | 344.9841 | FALSE      | FALSE      | TRUE    |
| C10H6NO3   | C10H6INO3- | 314.9398 | FALSE      | FALSE      | FALSE   |
| C6H8O6     | C6H8O6I-   | 302.9371 | FALSE      | FALSE      | TRUE    |
| C8H12O6    | C8H12IO6-  | 330.9684 | FALSE      | FALSE      | FALSE   |
| C7H8O7     | C7H8IO7-   | 330.932  | FALSE      | TRUE       | FALSE   |
| C9H14O5    | C9H14O5I-  | 328.9891 | FALSE      | FALSE      | TRUE    |
| C6H6O6     | C6H6IO6-   | 300.9215 | FALSE      | FALSE      | FALSE   |
| C4H4O6     | C4H4IO6-   | 274.9058 | FALSE      | FALSE      | FALSE   |
| C5H6O6     | C5H6O6I-   | 288.9215 | FALSE      | FALSE      | TRUE    |
| C8H8O7     | C8H8IO7-   | 342.932  | TRUE       | FALSE      | FALSE   |
| C3H4O4     | C3H4IO4-   | 230.916  | TRUE       | FALSE      | FALSE   |
| C8H10O8    | C8H10IO8-  | 360.9426 | FALSE      | FALSE      | FALSE   |

Table S11 TMB135 Medium-NO<sub>x</sub> I-CIMS

| sumFormula | ion      | x0       | commonions | uniqueions | mcmions |
|------------|----------|----------|------------|------------|---------|
| C4H6O2     | C4H7O2+  | 87.04406 | TRUE       | FALSE      | FALSE   |
| C3H6O2     | C3H7O2+  | 75.04406 | TRUE       | FALSE      | FALSE   |
| C2H8O4     | C2H9O4+  | 97.04954 | TRUE       | FALSE      | FALSE   |
| C3H8O2     | C3H9O2+  | 77.05971 | TRUE       | FALSE      | FALSE   |
| C2H4O3     | C2H5O3+  | 77.02332 | FALSE      | FALSE      | TRUE    |
| C4H8O3     | C4H9O3+  | 105.0546 | TRUE       | FALSE      | FALSE   |
| C5H6O3     | C5H7O3+  | 115.039  | TRUE       | FALSE      | TRUE    |
| C4H6O3     | C4H7O3+  | 103.039  | TRUE       | FALSE      | TRUE    |
| C6H8O3     | C6H9O3+  | 129.0546 | TRUE       | FALSE      | TRUE    |
| C6H8O2     | C6H9O2+  | 113.0597 | TRUE       | FALSE      | TRUE    |
| C5H8O2     | C5H9O2+  | 101.0597 | TRUE       | FALSE      | FALSE   |
| C6H8O1     | C6H9O+   | 97.06479 | FALSE      | FALSE      | FALSE   |
| C2H6O4     | C2H7O4+  | 95.03389 | TRUE       | FALSE      | FALSE   |
| C6H8O4     | C6H9O4+  | 145.0495 | TRUE       | FALSE      | TRUE    |
| C6H6O1     | C6H7O+   | 95.04914 | FALSE      | FALSE      | FALSE   |
| C6H6O3     | C6H7O3+  | 127.039  | TRUE       | FALSE      | FALSE   |
| C4H4O2     | C4H5O2+  | 85.02841 | TRUE       | FALSE      | FALSE   |
| C9H10O2    | C9H11O2+ | 151.0754 | FALSE      | FALSE      | TRUE    |
| C5H6O4     | C5H7O4+  | 131.0339 | TRUE       | FALSE      | TRUE    |
| C8H10O3    | C8H11O3+ | 155.0703 | TRUE       | FALSE      | TRUE    |

Table S12 TMB135 Low-NO<sub>x</sub> Vocus



| sumFormula | ion      | x0       | commonions | uniqueions | mcmions |
|------------|----------|----------|------------|------------|---------|
| C4H6O2     | C4H7O2+  | 87.04406 | TRUE       | FALSE      | TRUE    |
| C4H8O3     | C4H9O3+  | 105.0546 | TRUE       | FALSE      | TRUE    |
| C2H8O4     | C2H9O4+  | 97.04954 | TRUE       | FALSE      | FALSE   |
| C3H6O2     | C3H7O2+  | 75.04406 | TRUE       | FALSE      | TRUE    |
| C3H8O2     | C3H9O2+  | 77.05971 | TRUE       | FALSE      | FALSE   |
| C2H4O3     | C2H5O3+  | 77.02332 | FALSE      | FALSE      | TRUE    |
| C5H8O2     | C5H9O2+  | 101.0597 | TRUE       | FALSE      | FALSE   |
| C4H6O3     | C4H7O3+  | 103.039  | TRUE       | FALSE      | TRUE    |
| C5H6O3     | C5H7O3+  | 115.039  | TRUE       | FALSE      | TRUE    |
| C6H8O2     | C6H9O2+  | 113.0597 | TRUE       | FALSE      | TRUE    |
| C4H4O3     | C4H5O3+  | 101.0233 | TRUE       | FALSE      | TRUE    |
| C6H8O3     | C6H9O3+  | 129.0546 | TRUE       | FALSE      | TRUE    |
| C8H10O3    | C8H11O3+ | 155.0703 | TRUE       | FALSE      | FALSE   |
| C6H6O3     | C6H7O3+  | 127.039  | TRUE       | FALSE      | FALSE   |
| C8H6O4     | C8H7O4+  | 167.0339 | TRUE       | FALSE      | FALSE   |
| C5H6O2     | C5H7O2+  | 99.04406 | TRUE       | FALSE      | TRUE    |
| C6H8O1     | C6H9O+   | 97.06479 | FALSE      | FALSE      | FALSE   |
| C6H8O4     | C6H9O4+  | 145.0495 | TRUE       | FALSE      | TRUE    |
| C8H4O3     | C8H5O3+  | 149.0233 | TRUE       | FALSE      | FALSE   |
| C2H6O4     | C2H7O4+  | 95.03389 | TRUE       | FALSE      | FALSE   |

Table S13 TMB124 Low-NO<sub>x</sub> Vocus

| sumFormula | ion      | x0       | commonions | uniqueions | mcmions |
|------------|----------|----------|------------|------------|---------|
| C9H10O1    | C9H11O+  | 135.0804 | FALSE      | FALSE      | FALSE   |
| C3H8O2     | C3H9O2+  | 77.05971 | TRUE       | FALSE      | TRUE    |
| C3H6O2     | C3H7O2+  | 75.04406 | TRUE       | FALSE      | TRUE    |
| C7H6O1     | C7H7O+   | 107.0491 | FALSE      | FALSE      | FALSE   |
| C4H10O3    | C4H11O3+ | 107.0703 | TRUE       | FALSE      | FALSE   |
| C3H8O3     | C3H9O3+  | 93.05462 | TRUE       | FALSE      | TRUE    |
| C7H8O2     | C7H9O2+  | 125.0597 | TRUE       | FALSE      | FALSE   |
| C6H6O1     | C6H7O+   | 95.04914 | FALSE      | FALSE      | FALSE   |
| C4H6O2     | C4H7O2+  | 87.04406 | TRUE       | FALSE      | TRUE    |
| C4H8O2     | C4H9O2+  | 89.05971 | TRUE       | FALSE      | TRUE    |
| C2H8O4     | C2H9O4+  | 97.04954 | TRUE       | FALSE      | FALSE   |
| C4H10O2    | C4H11O2+ | 91.07536 | TRUE       | FALSE      | FALSE   |
| C3H4O4     | C3H5O4+  | 105.0182 | FALSE      | FALSE      | TRUE    |
| C4H8O3     | C4H9O3+  | 105.0546 | TRUE       | FALSE      | TRUE    |
| C3H2O3     | C3H3O3+  | 87.00767 | FALSE      | FALSE      | TRUE    |
| C3H4O3     | C3H5O3+  | 89.02332 | TRUE       | FALSE      | TRUE    |
| C4H4O3     | C4H5O3+  | 101.0233 | TRUE       | FALSE      | TRUE    |
| C3H6O3     | C3H7O3+  | 91.03897 | TRUE       | FALSE      | TRUE    |
| C4H6O3     | C4H7O3+  | 103.039  | TRUE       | FALSE      | FALSE   |
| C2H10O3    | C2H11O3+ | 83.07027 | TRUE       | FALSE      | FALSE   |

Table S14 PROP BENZ Low-NO<sub>x</sub> Vocus

| sumFormula | ion      | x0       | commonions | uniqueions | mcmions |
|------------|----------|----------|------------|------------|---------|
| C3H8O2     | C3H9O2+  | 77.05971 | TRUE       | FALSE      | TRUE    |
| C3H6O2     | C3H7O2+  | 75.04406 | TRUE       | FALSE      | TRUE    |
| C2H8O4     | C2H9O4+  | 97.04954 | TRUE       | FALSE      | FALSE   |
| C4H8O2     | C4H9O2+  | 89.05971 | TRUE       | FALSE      | TRUE    |
| C4H6O2     | C4H7O2+  | 87.04406 | TRUE       | FALSE      | TRUE    |
| C4H6O3     | C4H7O3+  | 103.039  | TRUE       | FALSE      | TRUE    |
| C4H10O3    | C4H11O3+ | 107.0703 | TRUE       | FALSE      | FALSE   |
| C4H8O3     | C4H9O3+  | 105.0546 | TRUE       | FALSE      | TRUE    |
| C8H10O2    | C8H11O2+ | 139.0754 | TRUE       | FALSE      | FALSE   |
| C6H6O4     | C6H7O4+  | 143.0339 | FALSE      | FALSE      | FALSE   |
| C3H4O4     | C3H5O4+  | 105.0182 | FALSE      | FALSE      | TRUE    |
| C6H6O1     | C6H7O+   | 95.04914 | FALSE      | FALSE      | FALSE   |
| C5H8O2     | C5H9O2+  | 101.0597 | TRUE       | FALSE      | TRUE    |
| C3H4O3     | C3H5O3+  | 89.02332 | TRUE       | FALSE      | TRUE    |
| C6H4O3     | C6H5O3+  | 125.0233 | TRUE       | FALSE      | FALSE   |
| C3H6O4     | C3H7O4+  | 107.0339 | TRUE       | FALSE      | TRUE    |
| C3H8O3     | C3H9O3+  | 93.05462 | TRUE       | FALSE      | TRUE    |
| C5H6O3     | C5H7O3+  | 115.039  | TRUE       | FALSE      | FALSE   |
| C5H6O2     | C5H7O2+  | 99.04406 | TRUE       | FALSE      | FALSE   |
| C6H6O3     | C6H7O3+  | 127.039  | TRUE       | FALSE      | FALSE   |

Table S15 IPRBENZ Low-NOx Vocus

| sumFormula | ion     | x0       | commonions | uniqueions |
|------------|---------|----------|------------|------------|
| C3H8O2     | C3H9O2+ | 77.05971 | TRUE       | FALSE      |
| C8H6O4     | C8H7O4+ | 167.0339 | TRUE       | FALSE      |
| C3H6O2     | C3H7O2+ | 75.04406 | TRUE       | FALSE      |
| C3H4O3     | C3H5O3+ | 89.02332 | TRUE       | FALSE      |
| C6H4O3     | C6H5O3+ | 125.0233 | TRUE       | FALSE      |
| C3H4O4     | C3H5O4+ | 105.0182 | FALSE      | FALSE      |
| C2H8O4     | C2H9O4+ | 97.04954 | TRUE       | FALSE      |
| C8H4O3     | C8H5O3+ | 149.0233 | TRUE       | FALSE      |
| C6H6O3     | C6H7O3+ | 127.039  | TRUE       | FALSE      |
| C3H6O4     | C3H7O4+ | 107.0339 | TRUE       | FALSE      |
| C6H6O1     | C6H7O+  | 95.04914 | FALSE      | FALSE      |
| C5H4O2     | C5H5O2+ | 97.02841 | TRUE       | FALSE      |
| C9H8O4     | C9H9O4+ | 181.0495 | FALSE      | FALSE      |
| C4H6O3     | C4H7O3+ | 103.039  | TRUE       | FALSE      |
| C4H6O2     | C4H7O2+ | 87.04406 | TRUE       | FALSE      |
| C5H6O2     | C5H7O2+ | 99.04406 | TRUE       | FALSE      |
| C5H8O5     | C5H9O5+ | 149.0445 | TRUE       | FALSE      |
| C5H8O2     | C5H9O2+ | 101.0597 | TRUE       | FALSE      |
| C3H6O3     | C3H7O3+ | 91.03897 | TRUE       | FALSE      |
| C3H2O3     | C3H3O3+ | 87.00767 | FALSE      | FALSE      |

Table S16 METHNAP Low-NOx Vocus

| sumFormula | ion      | x0       | commonions | uniqueions | mcmions |
|------------|----------|----------|------------|------------|---------|
| C3H8O2     | C3H9O2+  | 77.05971 | TRUE       | FALSE      | TRUE    |
| C3H6O2     | C3H7O2+  | 75.04406 | TRUE       | FALSE      | TRUE    |
| C4H6O2     | C4H7O2+  | 87.04406 | TRUE       | FALSE      | TRUE    |
| C4H6O3     | C4H7O3+  | 103.039  | TRUE       | FALSE      | TRUE    |
| C4H8O2     | C4H9O2+  | 89.05971 | TRUE       | FALSE      | TRUE    |
| C6H6O1     | C6H7O+   | 95.04914 | FALSE      | FALSE      | FALSE   |
| C4H8O3     | C4H9O3+  | 105.0546 | TRUE       | FALSE      | TRUE    |
| C4H10O3    | C4H11O3+ | 107.0703 | TRUE       | FALSE      | FALSE   |
| C5H8O2     | C5H9O2+  | 101.0597 | TRUE       | FALSE      | TRUE    |
| C8H10O2    | C8H11O2+ | 139.0754 | TRUE       | FALSE      | FALSE   |
| C2H3N1O3   | C2H4NO3+ | 90.01857 | FALSE      | FALSE      | FALSE   |
| C5H6O3     | C5H7O3+  | 115.039  | TRUE       | FALSE      | FALSE   |
| C3H4O3     | C3H5O3+  | 89.02332 | TRUE       | FALSE      | TRUE    |
| C3H4O4     | C3H5O4+  | 105.0182 | FALSE      | FALSE      | TRUE    |
| C5H6O2     | C5H7O2+  | 99.04406 | TRUE       | FALSE      | FALSE   |
| C9H10O1    | C9H11O+  | 135.0804 | FALSE      | FALSE      | FALSE   |
| C2H6O4     | C2H7O4+  | 95.03389 | TRUE       | FALSE      | FALSE   |
| C5H6O1     | C5H7O+   | 83.04914 | FALSE      | FALSE      | FALSE   |
| C3H6O3     | C3H7O3+  | 91.03897 | TRUE       | FALSE      | TRUE    |
| C8H8O2     | C8H9O2+  | 137.0597 | TRUE       | FALSE      | TRUE    |

Table S17 IPRBENZ medium-NOx Vocus

| sumFormula | ion       | x0       | commonions | uniqueions |
|------------|-----------|----------|------------|------------|
| C3H8O2     | C3H9O2+   | 77.05971 | TRUE       | FALSE      |
| C8H6O4     | C8H7O4+   | 167.0339 | FALSE      | FALSE      |
| C2H3N1O3   | C2H4NO3+  | 90.01857 | FALSE      | FALSE      |
| C3H6O2     | C3H7O2+   | 75.04406 | TRUE       | FALSE      |
| C8H4O3     | C8H5O3+   | 149.0233 | FALSE      | FALSE      |
| C3H4O3     | C3H5O3+   | 89.02332 | TRUE       | FALSE      |
| C2H5N1O4   | C2H6NO4+  | 108.0291 | FALSE      | FALSE      |
| C6H4O3     | C6H5O3+   | 125.0233 | TRUE       | FALSE      |
| C9H8O4     | C9H9O4+   | 181.0495 | FALSE      | FALSE      |
| C3H4O4     | C3H5O4+   | 105.0182 | FALSE      | FALSE      |
| C4H6O2     | C4H7O2+   | 87.04406 | TRUE       | FALSE      |
| C4H6O3     | C4H7O3+   | 103.039  | TRUE       | FALSE      |
| C9H6O3     | C9H7O3+   | 163.039  | FALSE      | FALSE      |
| C6H6O3     | C6H7O3+   | 127.039  | TRUE       | FALSE      |
| C5H4O2     | C5H5O2+   | 97.02841 | TRUE       | FALSE      |
| C5H8O2     | C5H9O2+   | 101.0597 | TRUE       | FALSE      |
| C5H6O2     | C5H7O2+   | 99.04406 | TRUE       | FALSE      |
| C3H6O4     | C3H7O4+   | 107.0339 | TRUE       | FALSE      |
| C2H4N2O2   | C2H5N2O2+ | 89.03455 | FALSE      | FALSE      |
| C3H2O3     | C3H3O3+   | 87.00767 | FALSE      | FALSE      |

Table S18 METHNAP medium-NOx Vocus

| sumFormula | ion      | x0       | commonions | uniqueions | mcmions |
|------------|----------|----------|------------|------------|---------|
| C9H10O1    | C9H11O+  | 135.0804 | FALSE      | FALSE      | FALSE   |
| C7H6O1     | C7H7O+   | 107.0491 | FALSE      | FALSE      | FALSE   |
| C3H6O2     | C3H7O2+  | 75.04406 | TRUE       | FALSE      | TRUE    |
| C4H10O3    | C4H11O3+ | 107.0703 | TRUE       | FALSE      | FALSE   |
| C3H8O2     | C3H9O2+  | 77.05971 | TRUE       | FALSE      | TRUE    |
| C7H8O2     | C7H9O2+  | 125.0597 | TRUE       | FALSE      | FALSE   |
| C3H8O3     | C3H9O3+  | 93.05462 | TRUE       | FALSE      | TRUE    |
| C6H6O1     | C6H7O+   | 95.04914 | FALSE      | FALSE      | FALSE   |
| C7H4O1     | C7H5O+   | 105.0335 | FALSE      | FALSE      | FALSE   |
| C4H6O2     | C4H7O2+  | 87.04406 | TRUE       | FALSE      | TRUE    |
| C2H4O3     | C2H5O3+  | 77.02332 | FALSE      | FALSE      | TRUE    |
| C4H8O2     | C4H9O2+  | 89.05971 | TRUE       | FALSE      | TRUE    |
| C4H8O3     | C4H9O3+  | 105.0546 | TRUE       | FALSE      | TRUE    |
| C3H6O3     | C3H7O3+  | 91.03897 | TRUE       | FALSE      | TRUE    |
| C7H6O3     | C7H7O3+  | 139.039  | TRUE       | FALSE      | TRUE    |
| C4H10O2    | C4H11O2+ | 91.07536 | TRUE       | FALSE      | FALSE   |
| C3H4O3     | C3H5O3+  | 89.02332 | TRUE       | FALSE      | TRUE    |
| C2H6O4     | C2H7O4+  | 95.03389 | TRUE       | FALSE      | FALSE   |
| C3H4O4     | C3H5O4+  | 105.0182 | FALSE      | FALSE      | TRUE    |
| C7H8O3     | C7H9O3+  | 141.0546 | TRUE       | FALSE      | TRUE    |

Table S19 PROP BENZ medium-NO<sub>x</sub> Vocus

| sumFormula | ion      | x0       | commonions | uniqueions | mcmions |
|------------|----------|----------|------------|------------|---------|
| C4H6O2     | C4H7O2+  | 87.04406 | TRUE       | FALSE      | TRUE    |
| C2H8O4     | C2H9O4+  | 97.04954 | FALSE      | TRUE       | FALSE   |
| C2H4O3     | C2H5O3+  | 77.02332 | FALSE      | FALSE      | TRUE    |
| C4H8O3     | C4H9O3+  | 105.0546 | TRUE       | FALSE      | TRUE    |
| C3H6O2     | C3H7O2+  | 75.04406 | TRUE       | FALSE      | TRUE    |
| C3H8O2     | C3H9O2+  | 77.05971 | TRUE       | FALSE      | FALSE   |
| C4H6O3     | C4H7O3+  | 103.039  | TRUE       | FALSE      | TRUE    |
| C2H6O4     | C2H7O4+  | 95.03389 | TRUE       | FALSE      | FALSE   |
| C5H8O2     | C5H9O2+  | 101.0597 | TRUE       | FALSE      | FALSE   |
| C5H6O3     | C5H7O3+  | 115.039  | TRUE       | FALSE      | TRUE    |
| C6H8O2     | C6H9O2+  | 113.0597 | TRUE       | FALSE      | TRUE    |
| C5H6O2     | C5H7O2+  | 99.04406 | TRUE       | FALSE      | TRUE    |
| C6H8O4     | C6H9O4+  | 145.0495 | TRUE       | FALSE      | TRUE    |
| C8H10O3    | C8H11O3+ | 155.0703 | TRUE       | FALSE      | FALSE   |
| C4H4O3     | C4H5O3+  | 101.0233 | TRUE       | FALSE      | TRUE    |
| C6H8O3     | C6H9O3+  | 129.0546 | TRUE       | FALSE      | TRUE    |
| C6H6O3     | C6H7O3+  | 127.039  | TRUE       | FALSE      | FALSE   |
| C4H4O2     | C4H5O2+  | 85.02841 | TRUE       | FALSE      | FALSE   |
| C6H8O1     | C6H9O+   | 97.06479 | FALSE      | FALSE      | FALSE   |
| C3H4O3     | C3H5O3+  | 89.02332 | TRUE       | FALSE      | TRUE    |

Table S20 TMB124 medium-NO<sub>x</sub> Vocus

| sumFormula | ion      | x0       | commonions | uniqueions | mcmions |
|------------|----------|----------|------------|------------|---------|
| C4H6O2     | C4H7O2+  | 87.04406 | TRUE       | FALSE      | FALSE   |
| C3H6O2     | C3H7O2+  | 75.04406 | TRUE       | FALSE      | FALSE   |
| C2H4O3     | C2H5O3+  | 77.02332 | FALSE      | FALSE      | TRUE    |
| C5H6O3     | C5H7O3+  | 115.039  | TRUE       | FALSE      | TRUE    |
| C4H6O3     | C4H7O3+  | 103.039  | TRUE       | FALSE      | TRUE    |
| C6H8O3     | C6H9O3+  | 129.0546 | TRUE       | FALSE      | TRUE    |
| C6H8O2     | C6H9O2+  | 113.0597 | TRUE       | FALSE      | TRUE    |
| C5H8O2     | C5H9O2+  | 101.0597 | TRUE       | FALSE      | FALSE   |
| C3H8O2     | C3H9O2+  | 77.05971 | TRUE       | FALSE      | FALSE   |
| C2H6O4     | C2H7O4+  | 95.03389 | TRUE       | FALSE      | FALSE   |
| C6H8O1     | C6H9O+   | 97.06479 | FALSE      | FALSE      | FALSE   |
| C4H8O3     | C4H9O3+  | 105.0546 | TRUE       | FALSE      | FALSE   |
| C6H8O4     | C6H9O4+  | 145.0495 | TRUE       | FALSE      | TRUE    |
| C4H4O2     | C4H5O2+  | 85.02841 | TRUE       | FALSE      | FALSE   |
| C9H10O2    | C9H11O2+ | 151.0754 | TRUE       | FALSE      | TRUE    |
| C8H10O3    | C8H11O3+ | 155.0703 | TRUE       | FALSE      | TRUE    |
| C6H10O4    | C6H11O4+ | 147.0652 | TRUE       | FALSE      | TRUE    |
| C6H6O2     | C6H7O2+  | 111.0441 | FALSE      | FALSE      | FALSE   |
| C6H6O3     | C6H7O3+  | 127.039  | TRUE       | FALSE      | FALSE   |
| C5H6O4     | C5H7O4+  | 131.0339 | TRUE       | FALSE      | TRUE    |

Table S21 TMB135 medium-NOx Vocus
